# Supplementary material for: The Role of Inflammation in Anal Cancer
Source: MDPI journal article supplement (doi:10.3390/diseases10020027), 2022-05-06
Supplement: s1 [file s1]

# The Role of Inflammation in Anal Cancer

Amir Selimagic <sup>1,\*</sup>, Ada Dozic <sup>2</sup>, Azra Husic-Selimovic <sup>1</sup>, Nijaz Tucakovic <sup>1</sup>, Amir Cehajic <sup>1</sup>, Anela Subo <sup>2</sup>, Azra Spahic <sup>2</sup> and Nedim Vanis <sup>2</sup>

<sup>1</sup> Department of Gastroenterohepatology, General Hospital “Prim. dr. Abdulah Nakas”, 71 000 Sarajevo, Bosnia and Herzegovina; husic\_azra@yahoo.com (A.H.-S.); tucakovic.nijaz@gmail.com (N.T.); amircehajic@hotmail.com (A.C.)

<sup>2</sup> Department of Internal Medicine, General Hospital “Prim. dr. Abdulah Nakas”, 71 000 Sarajevo, Bosnia and Herzegovina; ada.dozic@gmail.com (A.D.); anelasubo@gmail.com (A.S.); azraspahic@gmail.com (A.S.); nedim\_08@yahoo.com (N.V.)

\* Correspondence: selimagic.amir@gmail.com; Tel.: +387-33-285-100

**Table S1.** World Health Organization classification of tumors of the anal canal.

| <b>Epithelial Tumors</b>                                |
|---------------------------------------------------------|
| Premalignant lesions                                    |
| Anal intra-epithelial neoplasia (dysplasia), low-grade  |
| Anal intra-epithelial neoplasia (dysplasia), high-grade |
| Bowen disease                                           |
| Perianal squamous intra-epithelial neoplasia            |
| Paget’s disease                                         |
| Carcinoma                                               |
| Squamous cell carcinoma                                 |
| Verrucous carcinoma                                     |
| Undifferentiated carcinoma                              |
| Adenocarcinoma                                          |
| Mucinous adenocarcinoma                                 |
| Neuroendocrine neoplasms                                |
| Neuroendocrine tumor (NET) (carcinoid)                  |
| NET G1                                                  |
| NET G2                                                  |
| Neuroendocrine carcinoma (NEC)                          |
| Large-cell NEC                                          |
| Small-cell NEC                                          |
| Mixed adenoneuroendocrine carcinoma (MANEC)             |
| <b>Mesenchymal tumors</b>                               |
| <b>Secondary tumors</b>                                 |
